# Functional Connectivity Evoked by Orofacial Tactile Perception of Velocity

Yingying Wang<sup>1\*</sup>, Faitma Sibai<sup>1</sup>, Rebecca Custead<sup>1</sup>, Hyuntaek Oh<sup>1</sup>, Steven M. Barlow<sup>1</sup>

<sup>1</sup>University of Nebraska-Lincoln, United States

*Submitted to Journal:*  
Frontiers in Neuroscience

*Specialty Section:*  
Perception Science

*Article type:*  
Original Research Article

*Manuscript ID:*  
503208

*Received on:*  
07 Oct 2019

*Frontiers website link:*  
[www.frontiersin.org](http://www.frontiersin.org)

In review

---

### *Conflict of interest statement*

The authors declare that the research was conducted in the absence of any commercial or financial relationships that could be construed as a potential conflict of interest

### *Author contribution statement*

YW proposed and performed connectivity analysis, and drafted the manuscript. SM contributed to the conception, design, and data collection of the study, and revising the manuscript critically for important intellectual content. RC and HO carried out the experiment and data collection. FS organized and pre-processed the data. All authors read and approved the submitted version and agree to be accountable for all aspects of the work.

### *Keywords*

functional connectivity, orofacial, Pneumotactile stimulation, fMRI, saltatory velocity

### *Abstract*

Word count: 224

The cortical representation of orofacial pneumotactile stimulation involves a complex network, which is still unknown. This study aims to identify the characteristics of functional connectivity (FC) elicited by different saltatory velocities over the perioral and buccal surface of the lower face using functional magnetic resonance imaging (fMRI) in twenty neurotypical adults. Our results showed 25 cm/s evoked more functional coupling in the right hemisphere, suggesting 25 cm/s might be optimal velocity if bilateral brain damages occur. The decreased FC between the right secondary somatosensory cortex and right posterior parietal cortex for 5 cm/s versus All-on showed that the relatively slow velocity evoked less coupling in the ipsilateral hemisphere, which suggesting functional coupling in the contralateral hemisphere is in charge of orofacial tactile perception of velocity. The increased FC between the right thalamus and bilateral secondary somatosensory cortex for 65 cm/s versus All-on indicated that the neural encoding of relatively fast tactile velocity is more coupling between the right thalamus and bilateral secondary somatosensory cortex. Our results have shown different characteristics of FC for each seed at various velocity contrasts (5 > 25 cm/s, 5 > 65 cm/s, and 25 > 65 cm/s), suggesting the neuronal networks encoding the orofacial tactile perception of velocity. The difference of functional connectivity among three velocities may indicate the optimal stimulation setting for better therapeutic effects on stroke recovery.

### *Contribution to the field*

This is the first study using functional magnetic resonance imaging (fMRI) to identify the characteristics of functional connectivity elicited by novel pneumotactile stimulations with different velocity on the lower face. Our findings will elucidate the neuronal networks encoding the orofacial tactile perception of velocity. The difference in functional connectivity among three velocities may indicate the optimal stimulation setting for better therapeutic effects on stroke recovery.

### *Funding statement*

Thanks for funds from the Barkley Trust, Nebraska Tobacco Settlement Biomedical Research Development, College of Education and Human Sciences, and the Office of Research and Economic Development.

*Ethics statements*

*Studies involving animal subjects*

Generated Statement: No animal studies are presented in this manuscript.

*Studies involving human subjects*

Generated Statement: The studies involving human participants were reviewed and approved by University of Nebraska-Lincoln. The patients/participants provided their written informed consent to participate in this study.

*Inclusion of identifiable human data*

Generated Statement: No potentially identifiable human images or data is presented in this study.

In review

*Data availability statement*

Generated Statement: The datasets generated for this study are available on request to the corresponding author.

In review

# Functional Connectivity Evoked by Orofacial Tactile Perception of Velocity

1 **Yingying Wang<sup>1,2,3,4\*</sup>, Fatima Sibaii<sup>1,4</sup>, Rebecca Custead<sup>5</sup>, Hyuntaek Oh<sup>4,5</sup>, Steven M. Barlow<sup>2,4,5</sup>**

3 <sup>1</sup>Neuroimaging for language, literacy and learning laboratory, Department of Special Education and  
4 Communication Disorders, University of Nebraska-Lincoln, Lincoln, NE, U.S.A.

5 <sup>2</sup>Center for Brain, Biology and Behavior, University of Nebraska-Lincoln, Lincoln, NE, U.S.A.

6 <sup>3</sup>Nebraska Center for research on children, youth, families and schools, University of Nebraska-  
7 Lincoln, Lincoln, NE, U.S.A.

8 <sup>4</sup>Biomedical Engineering, University of Nebraska-Lincoln, Lincoln, NE, U.S.A.

9 <sup>5</sup>Communication Neuroscience Laboratory, Department of Special Education and Communication  
10 Disorders, University of Nebraska-Lincoln, Lincoln, NE, U.S.A.

11

12 **\* Correspondence:**

13 Yingying Wang

14 [yingying.wang@unl.edu](mailto:yingying.wang@unl.edu)

15 **Keywords: functional connectivity, orofacial, pneumotactile stimulation, fMRI, saltatory**  
16 **velocity**

17 **Abstract**

18 The cortical representation of orofacial pneumotactile stimulation involves a complex network,  
19 which is still unknown. This study aims to identify the characteristics of functional connectivity (FC)  
20 elicited by different saltatory velocities over the perioral and buccal surface of the lower face using  
21 functional magnetic resonance imaging (fMRI) in twenty neurotypical adults. Our results showed 25  
22 cm/s evoked more functional coupling in the right hemisphere, suggesting 25 cm/s might be optimal  
23 velocity if bilateral brain damages occur. The decreased FC between the right secondary  
24 somatosensory cortex and right posterior parietal cortex for 5 cm/s versus All-on showed that the  
25 relatively slow velocity evoked less coupling in the ipsilateral hemisphere, which suggesting  
26 functional coupling in the contralateral hemisphere is in charge of orofacial tactile perception of  
27 velocity. The increased FC between the right thalamus and bilateral secondary somatosensory cortex  
28 for 65 cm/s versus All-on indicated that the neural encoding of relatively fast tactile velocity is more  
29 coupling between the right thalamus and bilateral secondary somatosensory cortex. Our results have  
30 shown different characteristics of FC for each seed at various velocity contrasts (5 > 25 cm/s, 5 > 65  
31 cm/s, and 25 > 65 cm/s), suggesting the neuronal networks encoding the orofacial tactile perception  
32 of velocity. The difference of functional connectivity among three velocities may indicate the optimal  
33 stimulation setting for better therapeutic effects on stroke recovery.

34 **INTRODUCTION**

35 The somatosensory system can process complex tactile stimuli from peripheral receptors through  
36 interactions between bottom-up thalamocortical and top-down corticocortical/cortico-thalamo-  
37 cortical pathways (Avivi-Arber et al., 2011;Lundblad et al., 2011;Zembrzycki et al., 2013;Rocchi et  
38 al., 2016;Hwang et al., 2017). The somatosensory system can process complex information about the  
39 location, velocity and transverse length of tactile stimuli, and has high cortical plasticity (Charlton,  
40 2003). The cross-modality plasticity theory suggested that the somatosensory stimuli could evoke  
41 neural responses to promote learning new motor skills (Vidoni et al., 2010;Nasir et al., 2013;Ladda et  
42 al., 2014;Bernardi et al., 2015) and to perform accurate motor tasks (Pearson, 2000). Damages to the  
43 primary somatosensory cortex (SI) (e.g., by stroke, by traumatic brain injury, etc.) could result in  
44 orofacial sensory and motor deficits, the recovery of sensorimotor system requires changes in  
45 neuronal connections (Nudo, 2011;2013). Pneumotactile stimulation at different stimulus rates (2-6  
46 Hz) on lower face have shown significant short- and long-term adaptation patterns in primary and  
47 secondary somatosensory cortices, and posterior parietal cortex (Popescu et al., 2013;Custead et al.,  
48 2015;Venkatesan et al., 2015). Thus, it is essential to study the changes of neuronal networks under  
49 certain somatosensory stimuli, which will benefit the development of optimal rehabilitation strategies  
50 for maximizing sensorimotor recovery in disease (Kaelin-Lang et al., 2002;Wu et al., 2006).

51 Previous functional magnetic resonance imaging (fMRI) studies have identified somatosensory  
52 networks including SI (subareas BA 3a, 3b, 1, 2), secondary somatosensory cortex (SII, BA40, 43),  
53 primary motor cortex (MI, BA 4), supplemental motor area (SMA, BA 6), posterior parietal cortex  
54 (PPC, BA 7), prefrontal cortex, and insular cortex (IC), as well as sensorimotor integration regions in  
55 the superior temporal gyrus (STG), supramarginal gyrus (SMG), thalamus, and cerebellum (Blatow  
56 et al., 2007;Huang et al., 2012). The sensory information like tactile motion perception on the face is  
57 received by the mechanoreceptors that project to the brain through the trigeminal nerve (Haggard and  
58 de Boer, 2014). The lack of neural bases of moving stimulation on face limited our understanding of  
59 velocity and directional encoding in the sensory domain. Our fMRI study is the first to identify a  
60 putative neural somatosensory velocity network with bilateral SI, bilateral cerebellum, bilateral  
61 middle occipital gyrus, left MI, right SII, right STG, and right SMG, right inferior frontal gyrus (IFG)  
62 (Custead et al., 2017). Brain regions elicited by the stimulus arrays demonstrated potential  
63 neurotherapeutic applications and rapidly adapting brain networks could be potentially used for  
64 monitoring or inducing brain plasticity and neural circuit reorganization after pneumotactile  
65 stimulation (Custead et al., 2017). Custead *et al.* have used univariate generalized linear model  
66 (GLM) that assumes the brain regions to be functionally specialized (sometimes termed ‘functional  
67 segregation’) rather than functionally integrated. However, this perspective limited our understanding  
68 of how different brain regions communicate with each other, which is important to understand  
69 complex neuronal networks (Tononi et al., 1998). Functional connectivity (FC) measured by  
70 correlation between time series of brain regions does not measure structural connections (e.g., axonal  
71 projections), but represents functional coupling between two or more spatially or anatomically  
72 distinct regions of the brain (Stevens, 2009).

73 The aim of the present study is to identify the characteristics of FC elicited by different saltatory  
74 velocities over the perioral and buccal surface of the lower face using our previous fMRI data  
75 (Custead et al., 2017). The pneumotactile simulator described in our previous work have activated SI,  
76 SII, and PPC using different velocities (Custead et al., 2017). Combining with literature (Blatow et  
77 al., 2007;Huang et al., 2012), ten regions of interests (ROIs) including bilateral SI, SII, PPC,  
78 dorsolateral prefrontal cortex, and thalamus were selected for ROI-to-ROI analysis. Four ROIs  
79 including bilateral SI and SII were chosen for Seed-to-Voxel analysis. We hypothesize that three  
80 velocities will evoke different FC in the brain. Our results may indicate the optimal stimulation  
81 setting for better therapeutic effects on recovery for diseases (e.g., stroke, traumatic brain injury, etc.)

82 and provide insight into differences in the neurobiology of various therapeutic strategies (e.g.,  
83 velocities, etc.).

## 84 **MATERIALS AND METHODS**

### 85 **Participants**

86 Twenty healthy, right-handed, native English-speaking adults (15 females), 18-30 years of age (mean  
87  $\pm$  SD:  $22.3 \pm 1.7$ ), agreed to participate in the study after providing written informed consent. All  
88 participants had no history of neurological or psychiatric disorders, or any chronic illness or  
89 scheduled medications. The study was approved by the Institutional Review Board at the University  
90 of Nebraska-Lincoln.

### 91 **Paradigms**

92 Our previous publication detailed the study design (Custead et al., 2017; Oh et al., 2017) (see  
93 supplementary figure 1). We used a block design and each twenty-second task block was followed by  
94 twenty-second resting block. The twenty-second block of 5 cm/s, or 25 cm/s, or 65 cm/s, or All-on,  
95 or All-off was randomized using a multichannel pneumatic amplifier and tactile array known as the  
96 Galileo Somatosensory™ system (Epic Medical Concepts & Innovations, Inc., Mission, Kansas  
97 USA). The Galileo uses probes known as chambered tactile cells (TAC-Cells) that are made from  
98 acetyl thermoplastic homopolymer and use tiny volumes of compressed air to rapidly deform the  
99 surface of the skin. The TAC-Cells are MRI-safe and incorporate a small capsule with a sealing  
100 flange, which can be adhered to the face using double-adhesive tape collars, with scalable and  
101 programmable control to create saltatory tactile arrays (see supplementary figure 1). The individual  
102 pressure pulses were transmitted through polyurethane tubing into the MRI suite, while the Galileo  
103 pneumatic amplifier and controller were located outside the MRI suite. The different velocities  
104 represented the different speeds of the air pressure pulses traveling (saltation) through channel 1 to 5  
105 (see supplementary figure 1). For instance, the 5 cm/s indicated that the pressure pulses traveled  
106 through all channels sequentially within approximately 4 seconds. The 25 cm/s indicated that the  
107 pressure pulses traveled through all channels sequentially within approximately 1 second. The 65  
108 cm/s indicated that the pressure pulses traveled through all channels sequentially within  
109 approximately 0.5 second. The All-on indicated that the pressure pulses traveled through all channels  
110 simultaneously. The All-off indicated that no pressure pulse traveled through all channels, which is  
111 equivalent to resting period.

### 112 **Stimulus device**

113 Pneumotactile velocity stimuli were delivered to the facial skin by the Galileo system (see  
114 supplementary figure 1). For all stimuli, the Galileo system was programmed to generate biphasic  
115 pulses with duration of 60 ms, frequency of 1 Hz, 10 ms rise-fall time (10-90% intercepts), amplitude  
116 from -5 to 28 kPa. A laptop with windows 8.1 (64 bit) controlled the Galileo via an in-house software  
117 to generate sequential pressure pulses to channel 1 to 5. Pneumatic TAC-Cells were aligned on each  
118 participant from the right philtral column to the right (buccal) face. The individual array traverse  
119 length was calculated based on the distance between cells (each length measured from the center of  
120 one cell to center of the next). Because of bifurcation of the first two channels, both the upper and  
121 lower cells of those channels were considered 'first' and 'second' in the array. The measurement  
122 values of array length were used to designate on/off times for velocity sequences (traverse speed in  
123 cm/s). Therefore, velocity protocols were consistent across all participants, regardless of orofacial  
124 size. The resulting \*.xml program produced a series of pneumotactile saltatory stimuli that traversed

125 the skin in a repeating medial-to-lateral (upper/lower lips to lateral cheek) direction at three velocities  
126 (5, 25, 65 cm/s) as well as the ‘ALL-ON’ conditions. The stimulation array consisted of 7 small  
127 TAC-Cells that were adhered to the hairy skin of the right lower face, effectively sealing it to the  
128 skin. In this way, pressure dynamics within each cell resulted in skin deflection without acoustic or  
129 electrical artifact. Participants reported the resulting sensory experience as a moving sequence of  
130 discrete ‘taps’ or ‘raindrops’ on their lower face. These TAC-Cells are ported through a barb-fitting  
131 and connected to a 25 cm length of silicone tubing for flexible strain relief, and then coupled to a  
132 5.18 m (1.6 mm in diameter) polyurethane line attached to the designated pneumatic ports on the  
133 GALILEO stimulus generator (see supplementary figure 1). The flanged surface of each TAC-Cell  
134 was secured to the skin using double-adhesive tape collars following skin preparation with tincture of  
135 benzoin to improve adhesion.

### 136 **Data acquisition**

137 All images were acquired on a 3.0 T Siemens Skyra whole-body MRI system (Siemens Medical  
138 Solutions, Erlangen, Germany) with a 32-channel head coil. A high-resolution T1-weighted three-  
139 dimensional anatomical scan was acquired using magnetization-prepared rapid gradient-echo  
140 sequences (MPRAGE) with the following parameters: TR/TE/TA = 2.4 s/3.37 ms/5:35 minutes, flip  
141 angle = 7°, field of view = 256 x 256 mm, spatial resolution = 1 x 1 x 1 mm<sup>3</sup>, number of slices = 192.  
142 Following the MPRAGE anatomical scan, three sessions of functional MRI (fMRI) scans were  
143 recorded using a T2\*-weighted echo planar imaging (EPI) sequence with the following parameters:  
144 TR/TE/TA = 2.5 s/30 ms/800 s, voxel size = 2.5 x 2.5 x 2.5 mm<sup>3</sup>, flip angle = 83°, number of slices =  
145 41, number of volumes = 320.

146  
147 Pneumotactile stimulus generation was synchronized to the MRI scanner using the first optical output  
148 TR TTL (transistor-transistor logic) pulse generator. The first TR pulse from the scanner at the onset  
149 of each fMRI acquisition was input to a Berkeley Nucleonics (Model 645) programmable pulse  
150 generator connected to the Galileo system. The pulse generator served as a timing mechanism sent  
151 triggers to the Galileo system to produce a velocity sequence every 40 seconds. The Galileo system  
152 generated a velocity condition for 20 seconds, then wait for the external trigger to initiate the next  
153 velocity sequence. In total, there were three sessions of the functional image acquisitions. Each  
154 session consisted of four sets of twenty-second block of any of the five conditions (5 cm/s, 25 cm/s,  
155 65 cm/s, All-on, All-off were randomized) followed by twenty-second resting block. Each session  
156 consisted of 80-second 5 cm/s, 80-second 25 cm/s, 80-second 65 cm/s, 80-second All-on, and 80-  
157 second All-off, and 400-second resting period. In total, each session lasted approximately 800  
158 seconds. Nineteen participants completed all three sessions, while one participant only completed  
159 two sessions.

### 160 **Data analysis**

161 The CONN toolbox (Whitfield-Gabrieli and Nieto-Castanon, 2012)  
162 (<http://www.nitrc.org/projects/conn>) was used for pre-processing all images and compute brain  
163 connectivity using both seed-based and region-of-interests (ROIs)-based approaches. The CONN  
164 toolbox used Statistical Parametric Mapping (SPM12, <http://www.fil.ion.ucl.ac.uk/spm>) to pre-process  
165 all image volumes including following steps: motion artefact corrections (realignment and  
166 scrubbing). Both toolboxes are based on MATLAB (MathWorks, Natick, U.S.A.). The functional  
167 data were realigned to correct for head motion, scrubbed for outliers, coregistered to the structural  
168 image and normalized to the Montreal Neurological Institute (MNI) space. Normalized images were  
169 smoothed with an isotropic Gaussian kernel of 8 mm FWHM.



170  
171 The task-related functional connectivity was computed in the CONN toolbox. For each participant,  
172 CONN implemented CompCor to identify principal components associated with segmented white  
173 matter (WM) and cerebrospinal fluid (CSF) (Behzadi et al., 2007). These components were entered  
174 as confounds along with realignment parameters in a first-level analysis.

175  
176 For the ROI-to-ROI analyses, we studied functional connectivity between ROIs for different  
177 velocities (e.g., 5 cm/s, 25 cm/s, 65 cm/s, All-on). A total of ten ROIs (five bilateral ROIs, see  
178 supplementary table 1) were created using MNI coordinates in the CONN toolbox and the MNI  
179 coordinates were based on the literature. The averaged fMRI time series were extracted from each  
180 ROI. The ROI-to-ROI correlation coefficients were obtained by calculating all possible correlation  
181 coefficients between the time series of each pair of ROIs.

182  
183 For seed-based task-related functional connectivity analyses, we investigated connectivity between  
184 the four ROIs and all other voxels in the brain using seed-to-voxel analyses in the CONN toolbox.  
185 The four seeds (see supplementary table 1) including bilateral primary somatosensory cortex (SI) and  
186 secondary somatosensory cortex (SII) were chosen based on the literature to identify clusters of  
187 voxels in the brain exhibited the effects of velocity. The Seed-Voxel correlation coefficients were  
188 obtained by computing all possible cross-correlation coefficients between the time series of the seed  
189 and all residual voxels in the brain, and converting them to Z-scores. We used the second level  
190 analysis in CONN toolbox to compare functional connectivity among different velocity within group.

191  
192 To control for multiple testing, a False Discovery Rate (FDR) correction of  $q < 0.05$  was applied for  
193 all results (Benjamini and Hochberg, 1995).

## 194 **RESULTS**

### 195 **ROI-based functional connectivity**

196 In Figure 1, functional networks for each velocity (5 cm/s, 25 cm/s, and 65 cm/s) were overlaid onto  
197 three-dimensional rendered brain on the first row and task-related FC matrices for each velocity (5  
198 cm/s, 25 cm/s, and 65 cm/s) were plotted on the second row ( $p < 0.05$ , FDR corrected). Comparing 5  
199 cm/s and 25 cm/s task conditions, increased functional connectivity was identified between right  
200 DLPFC and right thalamus (see Figure 2). There is no significant difference of functional  
201 connectivity between 5 cm/s and 65 cm/s and between 25 cm/s and 65 cm/s for all ROI-to-ROI pairs.  
202 The contrast of 5 cm/s versus All-on condition showed significant decreased functional connectivity  
203 between right SII and right PPC and the contrast 65 cm/s versus All-on condition revealed increased  
204 functional connectivity between right thalamus and left SII and between right thalamus and right SII  
205 (see Figure 3).

### 206 **Seed-based functional connectivity**

207 The seed-to-voxel analysis assessed FCs between four seed regions covering bilateral SI and SII and  
208 all other voxels in the brain ( $p < 0.05$ , FDR corrected, cluster size  $> 35$ ). For the left SI seed, results  
209 revealed increased FC in the left PostCG and left SMG for 5 cm/s  $>$  25 cm/s (see Table 1 and Figure  
210 4), in the right pMTG, right cerebellum 6, and right AG for 5  $>$  65 cm/s (see Table 1 and Figure 4), in  
211 the bilateral iLOC, right sLOC, right FG, right Cerebellum 6 for 25  $>$  65 cm/s (see Table 1 and  
212 Figure 4). For the left SII seed, increased FCs were only in the left SPL and right sLOC for 25 cm/s  $>$   
213 65 cm/s (see Table 1 and Figure 5). For the right SI seed, increased FCs were shown in the left iLOC  
214 and right pMTG along with decreased FCs in the right IC for 5 cm/s  $>$  65 cm/s, and increased FCs

215 were also observed in the bilateral iLOC along with decreased FC in the left cerebellum crus 2 for 25  
 216 > 65 cm/s (see Table 1 and Figure 6). For the right SII seed, decreased FC was present in the right  
 217 SFG for both 5 > 65 cm/s and 25 > 65 cm/s. Additionally, increased FCs were shown in the left SPL  
 218 and sLOC for 25 > 65 cm/s (see Table 1 and Figure 7).

| Table 1. Seed-to-voxel results of changes in functional connectivity related to each velocity |                          |        |        |        |
|-----------------------------------------------------------------------------------------------|--------------------------|--------|--------|--------|
| Region                                                                                        | Coordinates in MNI space |        |        | Voxels |
|                                                                                               | X (mm)                   | Y (mm) | Z (mm) |        |
| <b>1. Left SI Seed</b>                                                                        |                          |        |        |        |
| <i>Contrast: 5 &gt; 25 cm/s</i>                                                               |                          |        |        |        |
| Left PostCG (35), aSMG (22)                                                                   | -38                      | -36    | 42     | 57     |
| <i>Contrast: 5 &gt; 65 cm/s</i>                                                               |                          |        |        |        |
| Right pMTG                                                                                    | 70                       | -22    | -12    | 155    |
| Right Cerebellum 6                                                                            | 34                       | -54    | -24    | 73     |
| Right AG                                                                                      | 60                       | -52    | 26     | 64     |
| <i>Contrast: 25 &gt; 65 cm/s</i>                                                              |                          |        |        |        |
| Left iLOC (140)                                                                               | -36                      | -78    | 2      | 140    |
| Right iLOC (490), sLOC (138), FG (64)                                                         | 40                       | -82    | -6     | 692    |
| Right FG (53), Right Cerebellum 6 (46)                                                        | 34                       | -60    | -22    | 99     |
| <b>2. Left SII Seed</b>                                                                       |                          |        |        |        |
| <i>Contrast: 25 &gt; 65 cm/s</i>                                                              |                          |        |        |        |
| Left SPL                                                                                      | -32                      | -52    | 68     | 42     |
| Right sLOC                                                                                    | 36                       | -84    | 18     | 42     |

### Brain Connectivity Evoked by Orofacial Stimuli

| <b>3. Right SI Seed</b>                                                                                                                                                                                                                                                                                                              |     |     |     |     |
|--------------------------------------------------------------------------------------------------------------------------------------------------------------------------------------------------------------------------------------------------------------------------------------------------------------------------------------|-----|-----|-----|-----|
| <i>Contrast: 5 &gt; 65 cm/s</i>                                                                                                                                                                                                                                                                                                      |     |     |     |     |
| Left iLOC                                                                                                                                                                                                                                                                                                                            | -42 | -72 | 2   | 78  |
| Right pMTG                                                                                                                                                                                                                                                                                                                           | 64  | -24 | -4  | 40  |
| <i>Contrast: 5 &lt; 65 cm/s</i>                                                                                                                                                                                                                                                                                                      |     |     |     |     |
| Right IC                                                                                                                                                                                                                                                                                                                             | 40  | -4  | -6  | 109 |
| <i>Contrast: 25 &gt; 65 cm/s</i>                                                                                                                                                                                                                                                                                                     |     |     |     |     |
| Left iLOC                                                                                                                                                                                                                                                                                                                            | -38 | -78 | 0   | 96  |
| Right iLOC                                                                                                                                                                                                                                                                                                                           | 46  | -82 | -4  | 298 |
| <i>Contrast: 25 &lt; 65 cm/s</i>                                                                                                                                                                                                                                                                                                     |     |     |     |     |
| Left Cerebellum Crus 2                                                                                                                                                                                                                                                                                                               | -38 | -66 | -54 | 34  |
| <b>4. Right SII Seed</b>                                                                                                                                                                                                                                                                                                             |     |     |     |     |
| <i>Contrast: 5 &lt; 65 cm/s</i>                                                                                                                                                                                                                                                                                                      |     |     |     |     |
| Right SFG                                                                                                                                                                                                                                                                                                                            | 18  | 8   | 66  | 76  |
| <i>Contrast: 25 &gt; 65 cm/s</i>                                                                                                                                                                                                                                                                                                     |     |     |     |     |
| Left SPL                                                                                                                                                                                                                                                                                                                             | -30 | -58 | 62  | 147 |
| <i>Contrast: 25 &lt; 65 cm/s</i>                                                                                                                                                                                                                                                                                                     |     |     |     |     |
| Right SFG                                                                                                                                                                                                                                                                                                                            | 18  | 12  | 48  | 50  |
| <p>Note. PostCG = Postcentral Gyrus, aSMG= anterior Supramarginal Gyrus, pMTG = posterior Middle Temporal Gyrus, AG = Angular Gyrus, iLOC = inferior Lateral Occipital Cortex, sLOC = superior Lateral Occipital Cortex, FG = Fusiform Gyrus, SPL = Superior Parietal Lobule, IC = Insular Cortex, SFG = Superior Frontal Gyrus.</p> |     |     |     |     |

## 220 **DISCUSSION**

221 The present study examined FC evoked by the orofacial tactile perception of velocity using fMRI in  
222 20 neurotypical adults. This is the first attempt to identify FC evoked by novel saltatory  
223 pneumotactile stimuli using TAC-Cells with the Galileo system. Our ROI-to-ROI results showed 25  
224 cm/s evoked more functional coupling in the right hemisphere (ipsilateral to the tactile stimuli) (see  
225 Figure 1), suggesting 25 cm/s might be optimal velocity if bilateral brain damages occur. The  
226 decreased FC between the right SII and right PPC for 5 cm/s versus All-on showed that the relatively  
227 slow velocity evoked less coupling in the ipsilateral hemisphere, which suggesting functional  
228 coupling in the contralateral hemisphere is in charge of orofacial tactile perception of velocity. The  
229 increased FC between the right thalamus and bilateral SII for 65 cm/s versus All-on indicated that the  
230 neural encoding of relatively fast tactile velocity is more coupling between the right thalamus and  
231 bilateral SII. The Seed-to-Voxel approach used bilateral SI and SII seeds to identify different network  
232 patterns for each velocity. Our results have shown different characteristics of FC for each seed at  
233 various velocity contrasts (5 > 25 cm/s, 5 > 65 cm/s, and 25 > 65 cm/s), suggesting the neuronal  
234 networks encoding the orofacial tactile perception of velocity.

### 235 **Orofacial Tactile Perception of Velocity**

236 Our paradigm passively delivered the tactile stimuli with various velocities (5, 25, 65 cm/s) to the  
237 right side of participants' face. For the All-on condition, the Galileo system delivered pressure pulses  
238 to all five channels simultaneously. The contrasts of velocity versus All-on condition (5, 25, or 65 >  
239 All-on) revealed FC evoked by the orofacial tactile perception of velocity. For 5 cm/s > All-on,  
240 reduced FC between the right SII and right PPC suggested less coupling in the right (ipsilateral)  
241 hemisphere, which aligns with our previous GLM results (Custead et al., 2017). The GLM results  
242 showed bilateral activation patterns when comparing 5 cm/s versus All-on. However, the GLM  
243 results are limited to the strength of the blood oxygen level depend (BOLD) signals and cannot  
244 determine the communication between brain regions, while FC analysis allows us to understand the  
245 coupling between brain regions. FMRI study has reported the representations of six body parts (face,  
246 fingers, legs, shoulders, lips, and toes) in the superior PPC (Huang et al., 2012). The increased FC  
247 between the right thalamus and bilateral SII for 65 cm/s > All-on indicated the role of thalamus as an  
248 integrative hub for functional brain networks (Hwang et al., 2017). Early animal study found that the  
249 SII receives substantial inputs from topographically appropriate regions within the ipsilateral  
250 ventrobasal nucleus and from the ipsilateral posterior group (Carvell and Simons, 1987), which  
251 proposed that SII in mice may complement the function of SI by helping to define the overall sensory  
252 context in which detailed tactile discriminations are made. Therefore, our results of the relatively  
253 faster velocity stimuli evoked stronger couplings between the right thalamus and bilateral SII  
254 suggested that SII in human may play an important role of discriminating velocity of orofacial tactile  
255 stimuli (Carvell and Simons, 1987;Tommerdahl et al., 2005a;Tommerdahl et al., 2005b).

256 For contrast 5 >25 cm/s, the ROI-to-ROI results showed significantly decreased FC between the right  
257 thalamus and the right DLPFC, which might be due to the increase of velocity requiring high level  
258 cognition (e.g., right DLPFC for attention and executive function) to decipher the tactile stimuli. The  
259 changes of temporal density of pneumotactile stimulation might drive the changes of neuronal  
260 populations in the brain during the orofacial tactile stimuli. The Seed-to-Voxel results indicated that  
261 the increased FC between the left SI seed and left PostCG/aSMG. Our previous fMRI findings have  
262 shown that the lowest temporal density of pneumotactile stimulation (5 cm/s) evoked the largest  
263 spatial extent of bilateral brain activity (Custead et al., 2017). Our FC results are complementary to  
264 our previous GLM results. Comparing to 25 cm/s, the low velocity 5 cm/s evoked stronger FC in the

265 contralateral hemisphere but weaker FC in the ipsilateral hemisphere. Thus, the FC evoked by the  
266 low velocity 5 cm/s is stronger than the FC evoked by the mid-range velocity 25 cm/s in the  
267 contralateral hemisphere, align with other studies in the literature (Dreyer et al., 1979; Lamb,  
268 1983; Whitsel et al., 1986).

269 For contrast  $5 > 65$  cm/s, we observed increased FCs in the left SI seed between the right AG, right  
270 pMTG, and right cerebellum 6, and increased FCs between the right SI seed and left iLOC and right  
271 pMTG, as well as decreased FCs between the right SI seed and right IC, and between the right SII  
272 seed and right SFG. The relatively slow velocity (5 cm/s) evoked stronger coupling between the left  
273 SI and left PostCG/left aSMG compared to the mid-range velocity (25 cm/s). The moving tactile  
274 stimuli presented at a low velocity such as 5 cm/s can appear to be processed in neuronal networks as  
275 discrete stimuli rather than a constant motion across the skin (Dépeault et al., 2013), which may  
276 contribute to the differences of FC versus other velocities. With the increases of stimulus velocity,  
277 enough loss of temporal and spatial details may lead to reduced discrimination accuracy (Lamb,  
278 1983). The right AG, right pMTG, right cerebellum regions, and right IC regions have corresponded  
279 to our previous GLM results (Custead et al., 2017). Both MTG, SMG, and IC have been reported to  
280 be part of a ventral attention network responsible for bottom-up attention and sensorimotor response  
281 inhibition (Corbetta et al., 2008; Igelström and Graziano, 2017). Moreover, the cerebellar  
282 involvement is consistent with the putative role of the cerebellum in feedforward control of sensory-  
283 guided movements at 5 cm/s (Custead et al., 2017).

284 For contrast  $25 > 65$  cm/s, there were increased FCs between the left SII seed and left SPL/right  
285 sLOC, the increased FCs between the right SI seed and bilateral iLOC and between the right SII seed  
286 and left SPL. The interhemispheric increased FCs We also observed the decreased FC between the  
287 right SI seed and the left cerebellum crus 2, and between the right SII seed and the right SFG. Other  
288 studies have suggested the optimal range for accurate discrimination of tactile velocity is between 3  
289 and 30 cm/s (Dreyer et al., 1979; Lamb, 1983; Whitsel et al., 1986). At higher velocity like 65 cm/s,  
290 participants are still able to discriminate the moving stimuli but with lower accuracy (Lamb, 1983).  
291 Therefore, the differences of FC patterns were presented between the two velocities.

292 The changes of FC for different velocities suggested that all three velocities can be used to induce  
293 neural plasticity and changes in neuronal connections. But each velocity has its uniqueness and can  
294 be used based on the sensitivity and spatial specificity needed for the specific neurotherapeutic  
295 applications.

## 296 **Contralateral versus Ipsilateral hemisphere**

297 Animal studies have already reported both contralateral and ipsilateral activation during unilateral or  
298 bilateral activation (Tommerdahl et al., 2010). Our results support the view of an ipsilateral influence  
299 on SII, align with other studies (Tommerdahl et al., 2005a; Tommerdahl et al., 2006). Neurons in SII  
300 most often have bilateral receptive fields, unlike neurons in SI (Whitsel et al., 1969). The present  
301 study depicted that reduced FC between the right PPC and right SII for 5 cm/s  $>$  All-on, suggesting  
302 the contralateral hemisphere evoked by the slow velocity is critical for neuronal encoding of orofacial  
303 tactile perception of velocity. We observed changes of FC in both hemispheres, in align with our  
304 previous report on bilateral cortical responses (Custead et al., 2017). The different velocities evoked  
305 different brain connectivity patterns. The interhemispheric (callosal) connections indicated  
306 pneumotactile stimulation reach SI via a two-stage pathway involving interhemispheric (callosal)  
307 connections between information processing levels higher than SI and subsequently via  
308 interhemispheric (corticocortical) projections to the SI face region. Our results are also align with that

309 the human somatosensory system processes the tactile stimuli in a hierarchical scheme of  
310 somatosensory processing (Inui et al., 2004;Tommerdahl et al., 2010).

### 311 **Limitations**

312 The present study has several limitations. First, the major limitation is the imaging modality that  
313 measures relatively slow hemodynamic responses on the order of second. fMRI data can provide  
314 some indirect measures to decode how the sensory system perceives different stimuli with various  
315 velocities. However, humans can make sensory decisions in less than 200 ms (Thorpe et al., 1996),  
316 which relies primarily on rapid synaptic neurotransmission on a time scale of millisecond (Kohn et  
317 al., 2002;Kohn and Whitsel, 2002). Thus, electrophysiology-based imaging approaches (i.e.,  
318 magnetoencephalography, electroencephalography) are more suitable to study the dynamic changes  
319 of this rapidly changing system (Puts et al., 2019). Second, the relatively small sample size and wider  
320 age range can limit the power of this study. Lastly, no behavioral measures are collected to check the  
321 individual differences of perception ability.

### 322 **Conclusions and Future Directions**

323 The present study found a distinct cortical connectivity pattern associated with each velocity. Our  
324 results demonstrated that the left SI evoked more connections than the left SII at three velocity  
325 settings (5 cm/s, 25 cm/s, 65 cm/s). The brain circuits changing with pneumotactile stimulation at  
326 different velocity settings indicate brain process tactile stimulation with different velocity settings  
327 differently. Physiologically, suprathreshold mechanical touch signals start as widespread, relatively  
328 diffuse activity across somatosensory macrocolumns that are driven by the characteristics of the  
329 stimulus. The paradigm in this study modulates neural circuits through changes in the velocity of a  
330 stimulus over a set block of time. While the velocity changes, neuronal populations may be driven by  
331 changes in the temporal density of pneumotactile stimulation. Animal and human studies have shown  
332 passively evoked sensory stimulation can enhance neuronal activity after stroke (Whitaker et al.,  
333 2007). Therefore, the present study has implications for applying various velocities to orofacial  
334 stimuli in order to bolster recovery for sensorimotor rehabilitation. For instance, combined with  
335 physical therapy for stroke patients or brain-injured survivors, it might induce more brain plasticity  
336 during rehabilitation (Small et al., 2002;Luft et al., 2005;da Guarda and Conforto, 2014).

### 337 **Acknowledgments**

338 We thank the families for their participation. We also thank the supports for undergraduate research  
339 assistants from the UNL UCARE program funded in part by gifts from the Pepsi Quasi Endowment  
340 and Union Bank & Trust.

### 341 **Ethics Statement**

342 The study was approved by the Institutional Review Board at University of Nebraska-Lincoln.  
343 Written informed consent was obtained from each participant in accordance with the Declaration of  
344 Helsinki.

### 345 **Author Contributions**

346 YW proposed and performed connectivity analysis, and drafted the manuscript. SM contributed to  
347 the conception, design, and data collection of the study, and revising the manuscript critically for  
348 important intellectual content. RC and HO carried out the experiment and data collection. FS

349 organized and pre-processed the data. All authors read and approved the submitted version and agree  
350 to be accountable for all aspects of the work.

### 351 **Conflict of Interest**

352 The authors declare that the research was conducted in the absence of any commercial or financial  
353 relationships that could be construed as a potential conflict of interest.

### 354 **Funding**

355 Thanks for funds from the Barkley Trust, Nebraska Tobacco Settlement Biomedical Research  
356 Development, College of Education and Human Sciences, and the Office of Research and Economic  
357 Development.

### 358 **Data Availability Statement**

359 The raw data supporting the conclusions of this manuscript will be made available by the authors,  
360 without undue reservation, to any qualified researcher.

### 361 **Supplementary Material**

362 The Supplementary Material for this article can be found online.

### 363 **Reference**

- 364 Avivi-Arber, L., Martin, R., Lee, J.C., and Sessle, B.J. (2011). Face sensorimotor cortex and its  
365 neuroplasticity related to orofacial sensorimotor functions. *Arch Oral Biol* 56, 1440-1465.
- 366 Behzadi, Y., Restom, K., Liau, J., and Liu, T.T. (2007). A component based noise correction method  
367 (CompCor) for BOLD and perfusion based fMRI. *Neuroimage* 37, 90-101.
- 368 Benjamini, Y., and Hochberg, Y. (1995). Controlling the false discovery rate: a practical and  
369 powerful approach to multiple testing. *Journal of the Royal statistical society: series B*  
370 *(Methodological)* 57, 289-300.
- 371 Bernardi, N.F., Darainy, M., and Ostry, D.J. (2015). Somatosensory contribution to the initial stages  
372 of human motor learning. *Journal of neuroscience* 35, 14316-14326.
- 373 Blatow, M., Nennig, E., Durst, A., Sartor, K., and Stippich, C. (2007). fMRI reflects functional  
374 connectivity of human somatosensory cortex. *Neuroimage* 37, 927-936.
- 375 Carvell, G.E., and Simons, D.J. (1987). Thalamic and corticocortical connections of the second  
376 somatic sensory area of the mouse. *J Comp Neurol* 265, 409-427.
- 377 Charlton, C. (2003). Prolonged peripheral nerve stimulation induces persistent changes in excitability  
378 of human motor cortex. *Journal of the Neurological Sciences* 208, 79-85.
- 379 Corbetta, M., Patel, G., and Shulman, G.L. (2008). The reorienting system of the human brain: from  
380 environment to theory of mind. *Neuron* 58, 306-324.
- 381 Custead, R., Oh, H., Rosner, A.O., and Barlow, S. (2015). Adaptation of the cortical somatosensory  
382 evoked potential following pulsed pneumatic stimulation of the lower face in adults. *Brain*  
383 *research* 1622, 81-90.

- 384 Custead, R., Oh, H., Wang, Y., and Barlow, S. (2017). Brain encoding of saltatory velocity through a  
385 pulsed pneumotactile array in the lower face. *Brain Res* 1677, 58-73.
- 386 Da Guarda, S.N.F., and Conforto, A.B. (2014). Effects of somatosensory stimulation on corticomotor  
387 excitability in patients with unilateral cerebellar infarcts and healthy subjects-preliminary  
388 results. *Cerebellum & ataxias* 1, 16.
- 389 Dépeault, A., Meftah, E.-M., and Chapman, C.E. (2013). Neuronal correlates of tactile speed in  
390 primary somatosensory cortex. *Journal of neurophysiology* 110, 1554-1566.
- 391 Dreyer, D., Duncan, G., Wong, C., and Whitsel, B. (1979). Factors influencing capacity to judge  
392 direction of tactile stimulus movement on the face. *Journal of dental research* 58, 2052-2057.
- 393 Haggard, P., and De Boer, L. (2014). Oral somatosensory awareness. *Neurosci Biobehav Rev* 47,  
394 469-484.
- 395 Huang, R.S., Chen, C.F., Tran, A.T., Holstein, K.L., and Sereno, M.I. (2012). Mapping multisensory  
396 parietal face and body areas in humans. *Proc Natl Acad Sci U S A* 109, 18114-18119.
- 397 Hwang, K., Bertolero, M.A., Liu, W.B., and D'esposito, M. (2017). The Human Thalamus Is an  
398 Integrative Hub for Functional Brain Networks. *J Neurosci* 37, 5594-5607.
- 399 Igelström, K.M., and Graziano, M.S. (2017). The inferior parietal lobule and temporoparietal  
400 junction: a network perspective. *Neuropsychologia* 105, 70-83.
- 401 Inui, K., Wang, X., Tamura, Y., Kaneoke, Y., and Kakigi, R. (2004). Serial processing in the human  
402 somatosensory system. *Cereb Cortex* 14, 851-857.
- 403 Kaelin-Lang, A., Luft, A.R., Sawaki, L., Burstein, A.H., Sohn, Y.H., and Cohen, L.G. (2002).  
404 Modulation of human corticomotor excitability by somatosensory input. *J Physiol* 540, 623-  
405 633.
- 406 Kohn, A., Metz, C., Tommerdahl, M.A., and Whitsel, B.L. (2002). Stimulus-evoked modulation of  
407 sensorimotor pyramidal neuron EPSPs. *J Neurophysiol* 88, 3331-3347.
- 408 Kohn, A., and Whitsel, B.L. (2002). Sensory cortical dynamics. *Behavioural Brain Research* 135,  
409 119-126.
- 410 Ladda, A.M., Pfannmoeller, J.P., Kalisch, T., Roschka, S., Platz, T., Dinse, H.R., and Lotze, M.  
411 (2014). Effects of combining 2 weeks of passive sensory stimulation with active hand motor  
412 training in healthy adults. *PLoS One* 9, e84402.
- 413 Lamb, G.D. (1983). Tactile discrimination of textured surfaces: psychophysical performance  
414 measurements in humans. *The Journal of Physiology* 338, 551-565.
- 415 Luft, A.R., Manto, M.-U., and Taib, N.O.B. (2005). Modulation of motor cortex excitability by  
416 sustained peripheral stimulation: the interaction between the motor cortex and the cerebellum.  
417 *The Cerebellum* 4, 90.
- 418 Lundblad, L.C., Olausson, H.W., Hermansson, A.K., and Wasling, H.B. (2011). Cortical processing  
419 of tactile direction discrimination based on spatiotemporal cues in man. *Neurosci Lett* 501,  
420 45-49.
- 421 Nasir, S.M., Darainy, M., and Ostry, D.J. (2013). Sensorimotor adaptation changes the neural coding  
422 of somatosensory stimuli. *J Neurophysiol* 109, 2077-2085.
- 423 Nudo, R.J. (2011). Neural bases of recovery after brain injury. *J Commun Disord* 44, 515-520.



- 424 Nudo, R.J. (2013). Recovery after brain injury: mechanisms and principles. *Front Hum Neurosci* 7,  
425 887.
- 426 Oh, H., Custead, R., Wang, Y., and Barlow, S. (2017). Neural encoding of saltatory pneumotactile  
427 velocity in human glabrous hand. *PLoS One* 12, e0183532.
- 428 Pearson, K. (2000). Motor systems. *Current opinion in neurobiology* 10, 649-654.
- 429 Popescu, E.A., Barlow, S.M., Venkatesan, L., Wang, J., and Popescu, M. (2013). Adaptive changes  
430 in the neuromagnetic response of the primary and association somatosensory areas following  
431 repetitive tactile hand stimulation in humans. *Human brain mapping* 34, 1415-1426.
- 432 Puts, N.a.J., Edden, R.a.E., Muthukumaraswamy, S., Singh, K.D., and Mcgonigle, D.J. (2019).  
433 Induced and Evoked Properties of Vibrotactile Adaptation in the Primary Somatosensory  
434 Cortex. *Neural Plast* 2019, 5464096.
- 435 Rocchi, L., Casula, E., Tocco, P., Berardelli, A., and Rothwell, J. (2016). Somatosensory temporal  
436 discrimination threshold involves inhibitory mechanisms in the primary somatosensory area.  
437 *Journal of Neuroscience* 36, 325-335.
- 438 Small, S., Hlustik, P., Noll, D., Genovese, C., and Solodkin, A. (2002). Cerebellar hemispheric  
439 activation ipsilateral to the paretic hand correlates with functional recovery after stroke. *Brain*  
440 125, 1544-1557.
- 441 Stevens, M.C. (2009). The developmental cognitive neuroscience of functional connectivity. *Brain*  
442 *and Cognition* 70, 1-12.
- 443 Thorpe, S., Fize, D., and Marlot, C. (1996). Speed of processing in the human visual system. *nature*  
444 381, 520.
- 445 Tommerdahl, M., Favorov, O.V., and Whitsel, B.L. (2010). Dynamic representations of the  
446 somatosensory cortex. *Neurosci Biobehav Rev* 34, 160-170.
- 447 Tommerdahl, M., Simons, S.B., Chiu, J.S., Favorov, O., and Whitsel, B. (2005a). Response of SI  
448 cortex to ipsilateral, contralateral and bilateral flutter stimulation in the cat. *BMC Neurosci* 6,  
449 29.
- 450 Tommerdahl, M., Simons, S.B., Chiu, J.S., Favorov, O., and Whitsel, B.L. (2006). Ipsilateral input  
451 modifies the primary somatosensory cortex response to contralateral skin flutter. *J Neurosci*  
452 26, 5970-5977.
- 453 Tommerdahl, M., Simons, S.B., Chiu, J.S., Tannan, V., Favorov, O., and Whitsel, B. (2005b).  
454 Response of SII cortex to ipsilateral, contralateral and bilateral flutter stimulation in the cat.  
455 *BMC Neurosci* 6, 11.
- 456 Tononi, G., Edelman, G.M., and Sporns, O. (1998). Complexity and coherency: integrating  
457 information in the brain. *Trends in cognitive sciences* 2, 474-484.
- 458 Venkatesan, L., Barlow, S.M., and Kieweg, D. (2015). Age-and sex-related changes in vibrotactile  
459 sensitivity of hand and face in neurotypical adults. *Somatosensory & motor research* 32, 44-  
460 50.
- 461 Vidoni, E., Acerra, N., Dao, E., Meehan, S., and Boyd, L. (2010). Role of the primary somatosensory  
462 cortex in motor learning: An rTMS study. *Neurobiology of learning and memory* 93, 532-539.
- 463 Whitaker, V.R., Cui, L., Miller, S., Yu, S.P., and Wei, L. (2007). Whisker stimulation enhances  
464 angiogenesis in the barrel cortex following focal ischemia in mice. *J Cereb Blood Flow*  
465 *Metab* 27, 57-68.

- 466 Whitfield-Gabrieli, S., and Nieto-Castanon, A. (2012). Conn: a functional connectivity toolbox for  
467 correlated and anticorrelated brain networks. *Brain connectivity* 2, 125-141.
- 468 Whitsel, B., Franzen, O., Dreyer, D., Hollins, M., Young, M., Essick, G., and Wong, C. (1986).  
469 Dependence of subjective traverse length on velocity of moving tactile stimuli.  
470 *Somatosensory Research* 3, 185-196.
- 471 Whitsel, B.L., Petrucelli, L.M., and Werner, G. (1969). Symmetry and connectivity in the map of the  
472 body surface in somatosensory area II of primates. *Journal of Neurophysiology* 32, 170-183.
- 473 Wu, C.W., Seo, H.-J., and Cohen, L.G. (2006). Influence of electric somatosensory stimulation on  
474 paretic-hand function in chronic stroke. *Archives of physical medicine and rehabilitation* 87,  
475 351-357.
- 476 Zembrzycki, A., Chou, S.-J., Ashery-Padan, R., Stoykova, A., and O'leary, D.D. (2013). Sensory  
477 cortex limits cortical maps and drives top-down plasticity in thalamocortical circuits. *Nature*  
478 *neuroscience* 16, 1060.

### 479 **Figure legends**

- 480 Figure 1. Shows ROI-to-ROI based connectivity maps (first row) and connectivity adjacent matrices  
481 (second row) for three velocities (5, 25, 65 cm/s). Total six region of interests (ROIs) include  
482 bilateral primary somatosensory cortex (L\_SI and R\_SI), bilateral supplementary somatosensory  
483 cortex (L\_SII and R\_SII), bilateral Posterior Parietal Cortex (L\_PPC and R\_PPC), bilateral  
484 dorsolateral Prefrontal Cortex (L\_DLPFC and R\_DLPFC), and bilateral thalamus (L\_Thalamus and  
485 R\_Thalamus).
- 486 Figure 2. Shows increased connectivity between the right thalamus and right DLPFC for 25 > 5 cm/s  
487 contrast ( $p < 0.05$ , FDR corrected).
- 488 Figure 3. Shows increased connectivity between the right SII and the right PPC for 5 cm/s > All-on  
489 and increased connectivity between the right thalamus and the bilateral SII for 65 cm/s ( $p < 0.05$ ,  
490 FDR corrected).
- 491 Figure 4. Shows the left SI seed (green sphere) overlaid on a standardized three-dimensional template  
492 and the seed-to-voxel results were presented on the right ( $p < 0.05$ , FDR corrected).
- 493 Figure 5. Shows the left SII seed (green sphere) overlaid on a standardized three-dimensional  
494 template and the seed-to-voxel results were presented on the right ( $p < 0.05$ , FDR corrected).
- 495 Figure 6. Shows the right SI seed (green sphere) overlaid on a standardized three-dimensional  
496 template and the seed-to-voxel results were presented on the right ( $p < 0.05$ , FDR corrected).
- 497 Figure 7. Shows the right SII seed (green sphere) overlaid on a standardized three-dimensional  
498 template and the seed-to-voxel results were presented on the right ( $p < 0.05$ , FDR corrected).

Figure 1.JPEG

bioRxiv preprint doi: <https://doi.org/10.1101/843441>; this version posted November 16, 2019. The copyright holder for this preprint (which was not certified by peer review) is the author/funder. All rights reserved. No reuse allowed without permission.

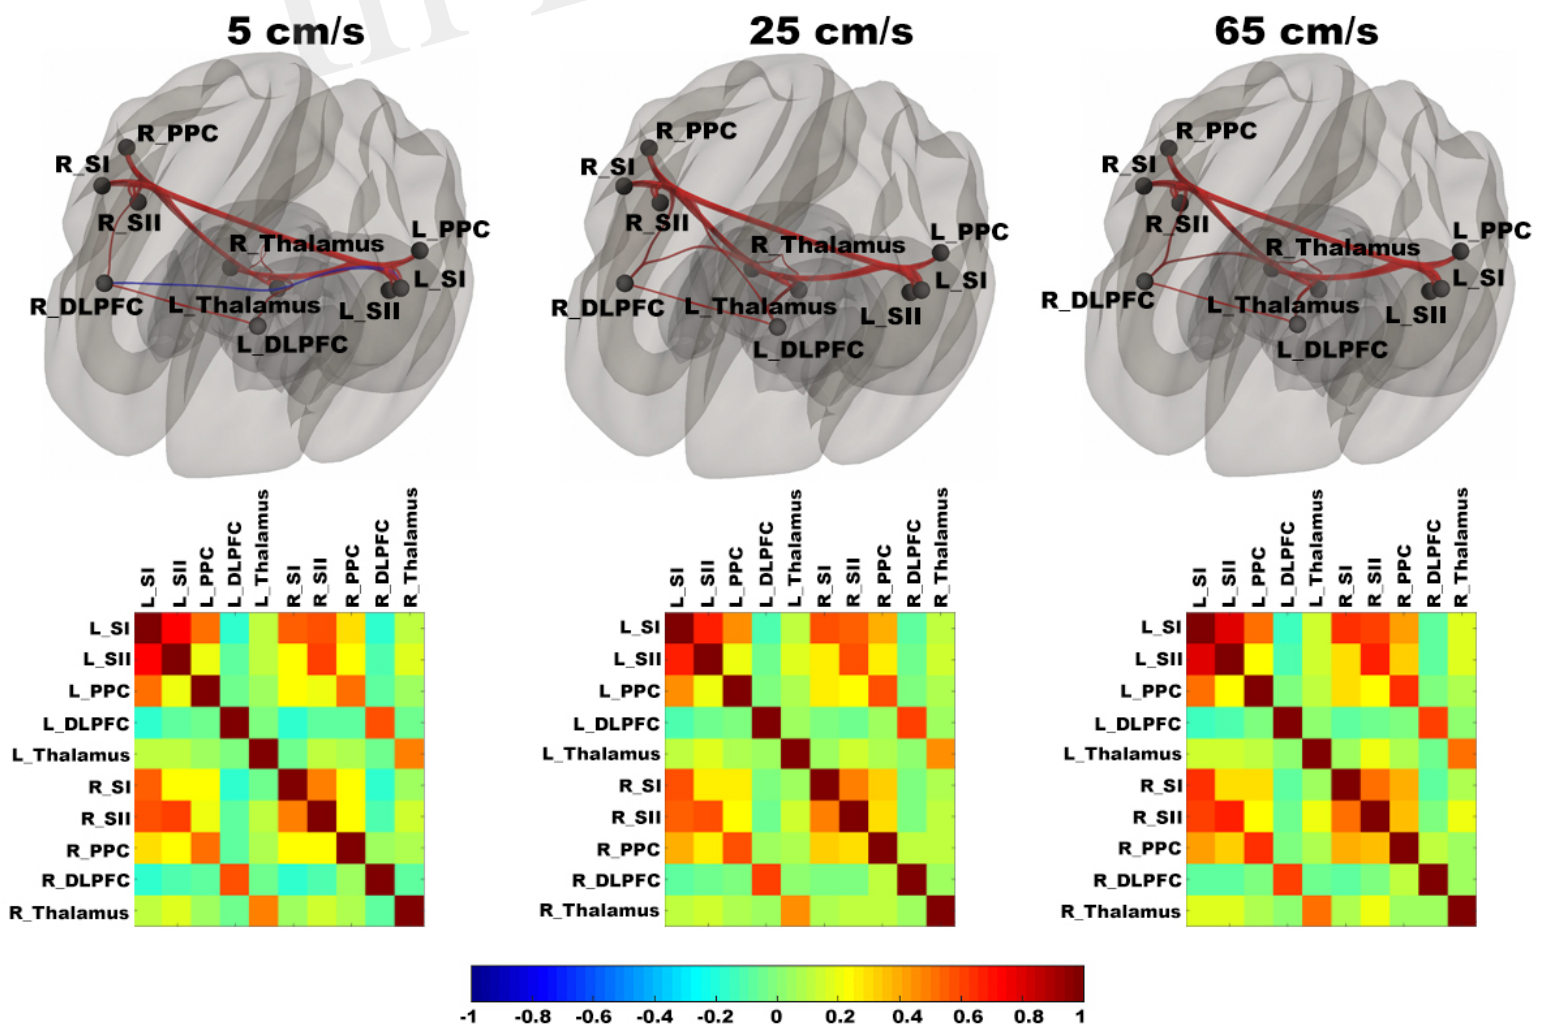

Figure 2.JPEG

bioRxiv preprint doi: <https://doi.org/10.1101/843441>; this version posted November 16, 2019. The copyright holder for this preprint (which was not certified by peer review) is the author/funder. All rights reserved. No reuse allowed without permission.

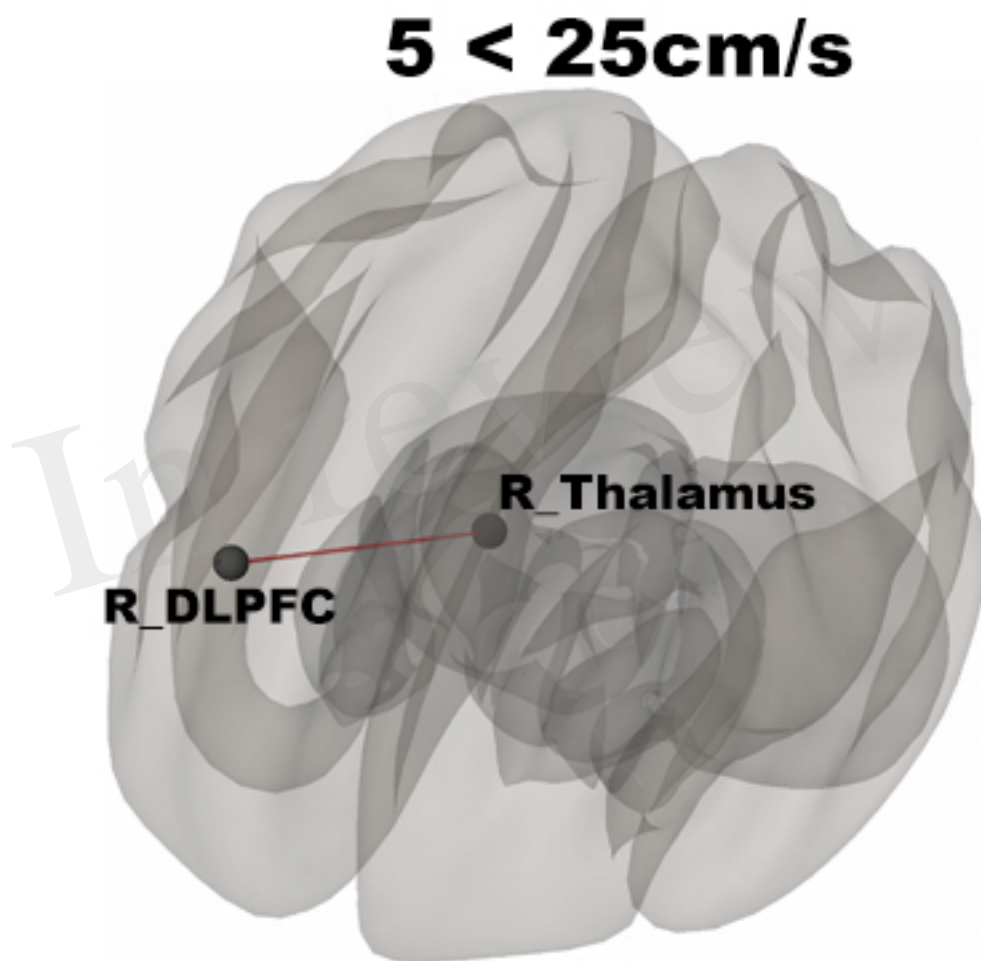

Figure 3.JPEG

bioRxiv preprint doi: <https://doi.org/10.1101/843441>; this version posted November 16, 2019. The copyright holder for this preprint (which was not certified by peer review) is the author/funder. All rights reserved. No reuse allowed without permission.

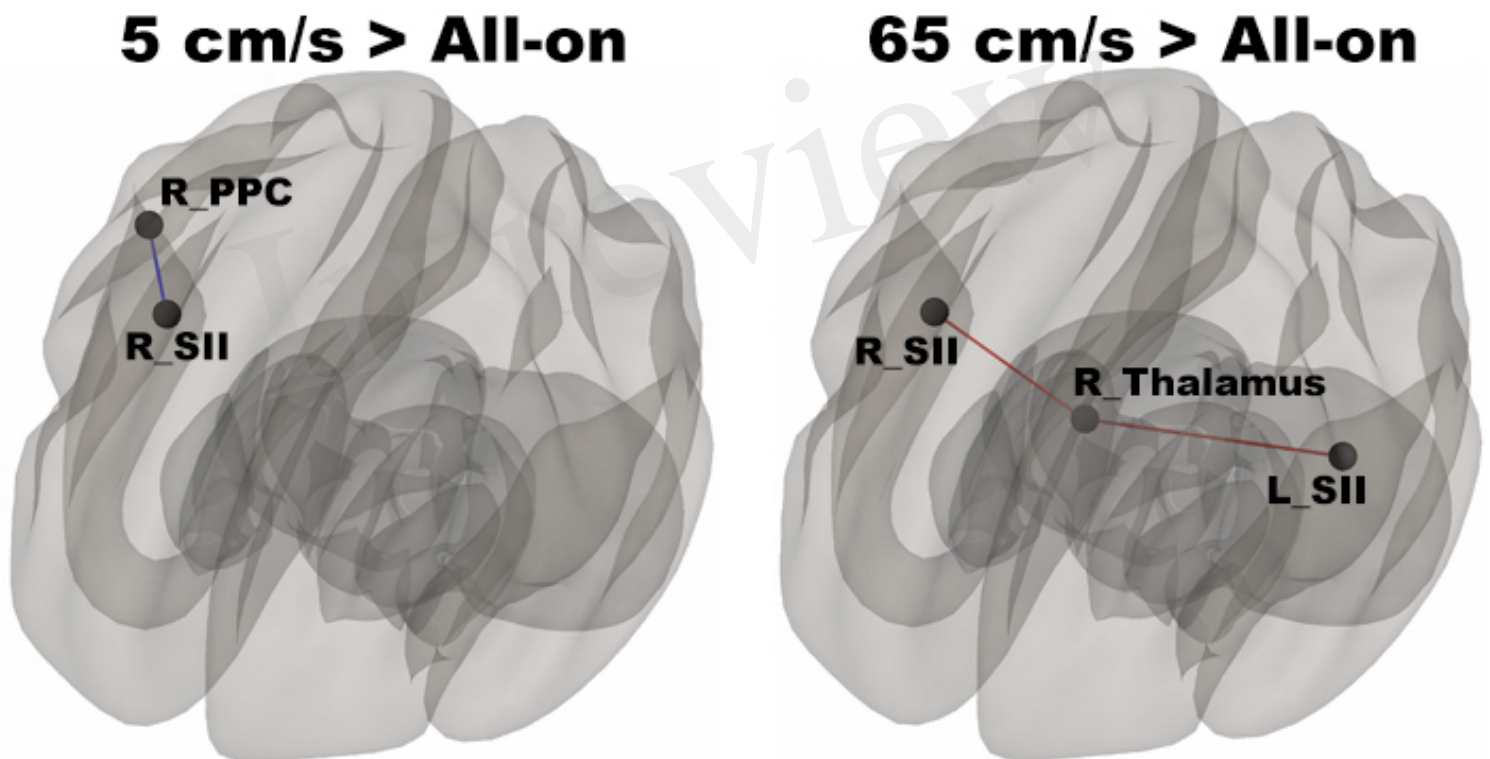

Figure 4.JPEG

bioRxiv preprint doi: <https://doi.org/10.1101/843441>; this version posted November 16, 2019. The copyright holder for this preprint (which was not certified by peer review) is the author/funder. All rights reserved. No reuse allowed without permission.

In review

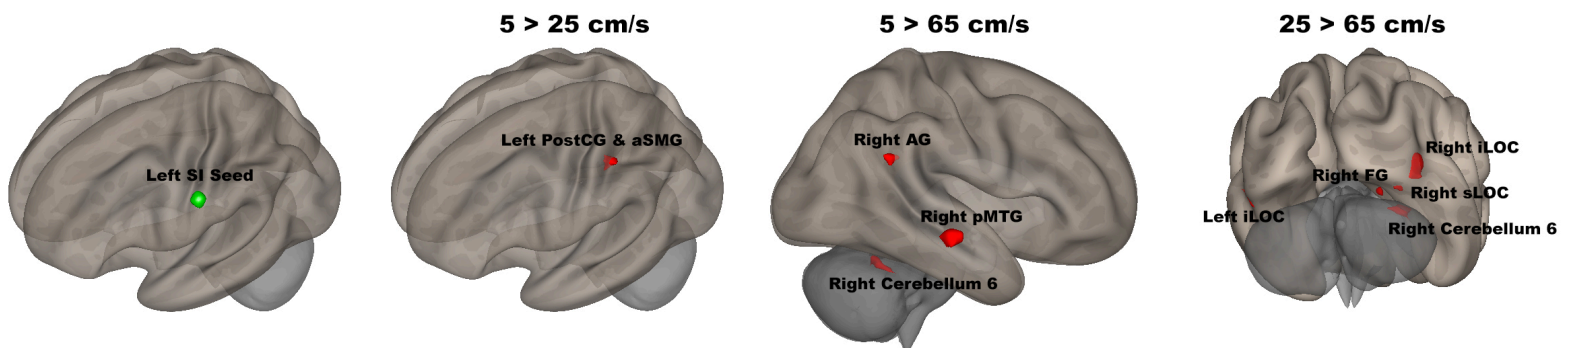

Figure 5.JPEG

bioRxiv preprint doi: <https://doi.org/10.1101/843441>; this version posted November 16, 2019. The copyright holder for this preprint (which was not certified by peer review) is the author/funder. All rights reserved. No reuse allowed without permission.

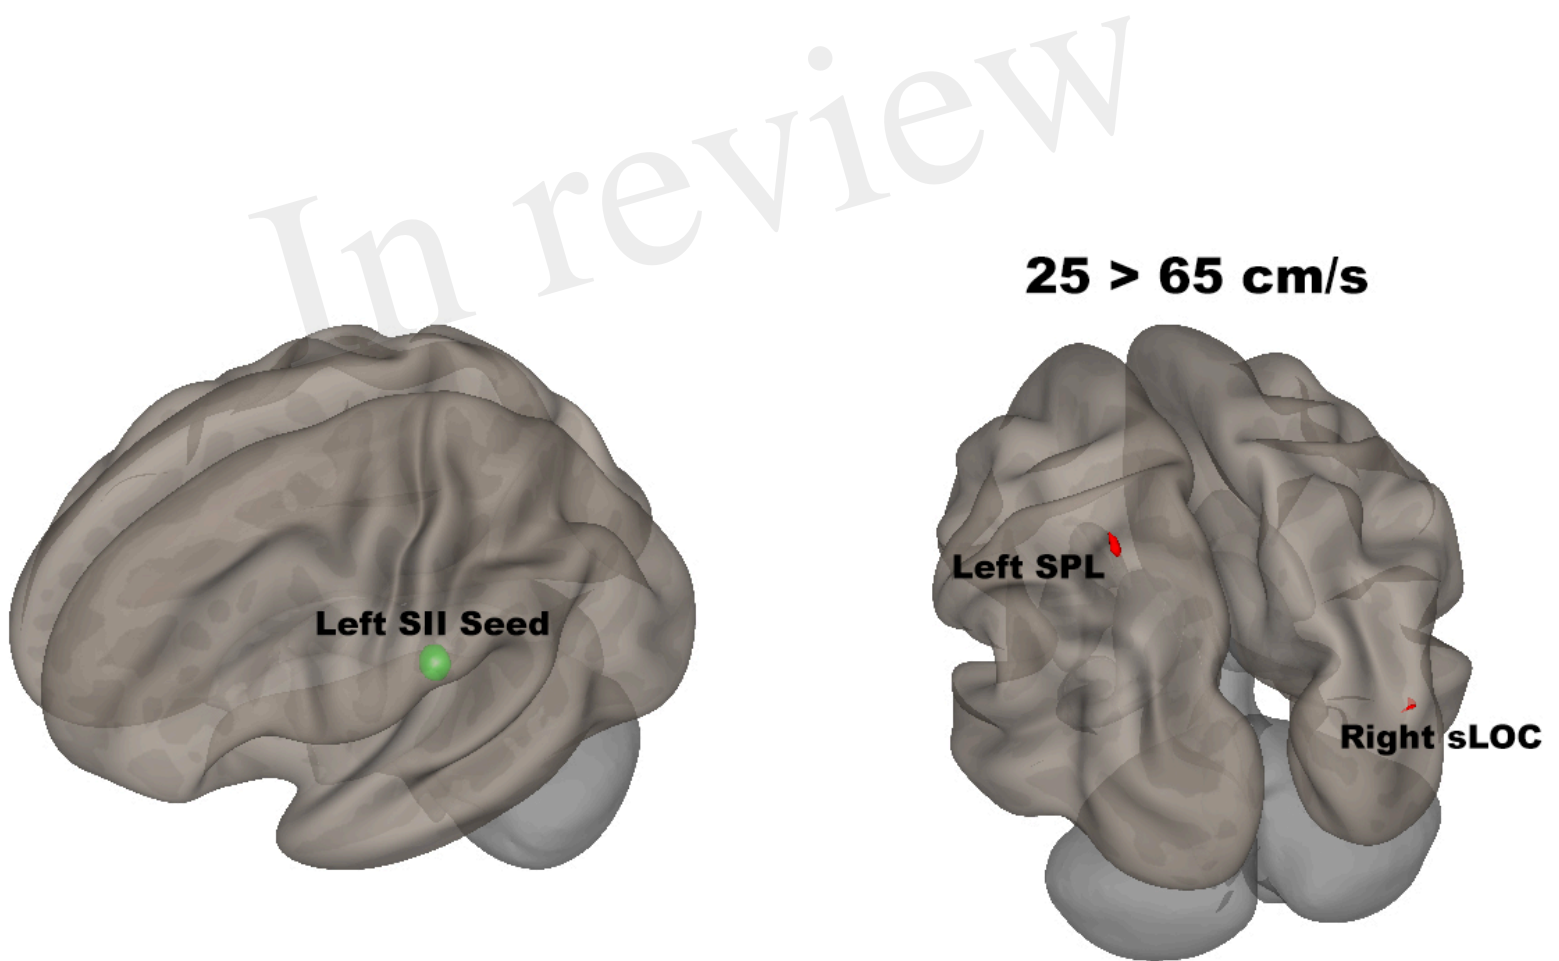

Figure 6.JPEG

bioRxiv preprint doi: <https://doi.org/10.1101/843441>; this version posted November 16, 2019. The copyright holder for this preprint (which was not certified by peer review) is the author/funder. All rights reserved. No reuse allowed without permission.

In review

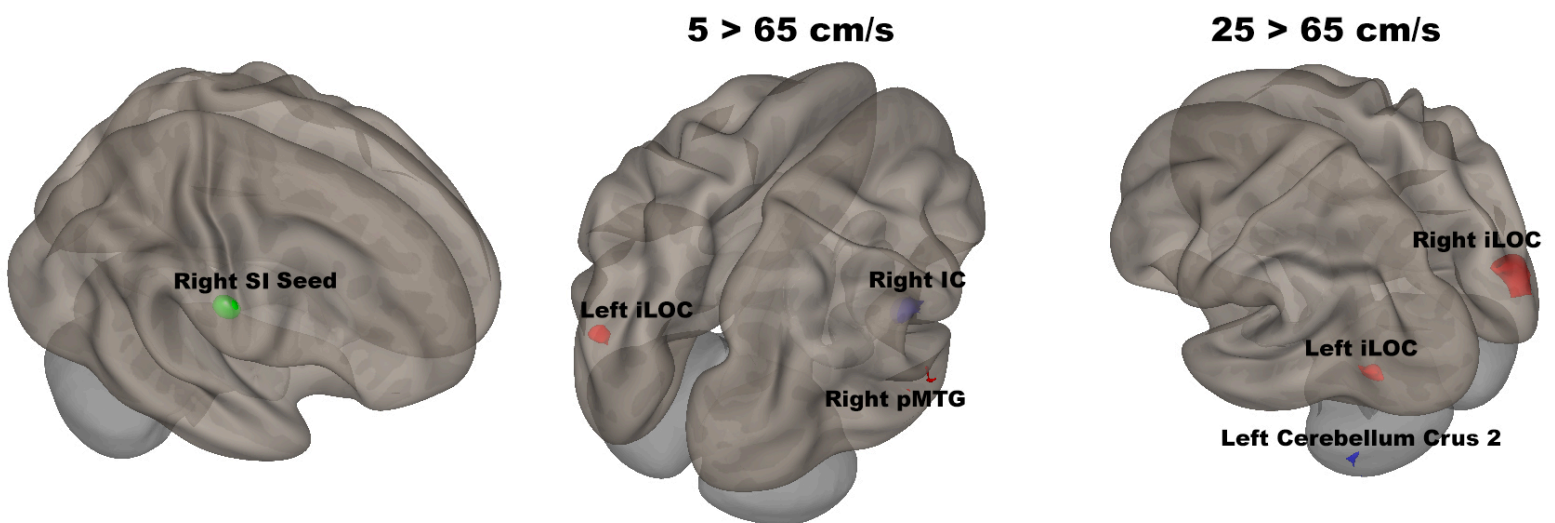



Figure 7.JPEG

bioRxiv preprint doi: <https://doi.org/10.1101/843441>; this version posted November 16, 2019. The copyright holder for this preprint (which was not certified by peer review) is the author/funder. All rights reserved. No reuse allowed without permission.

In review

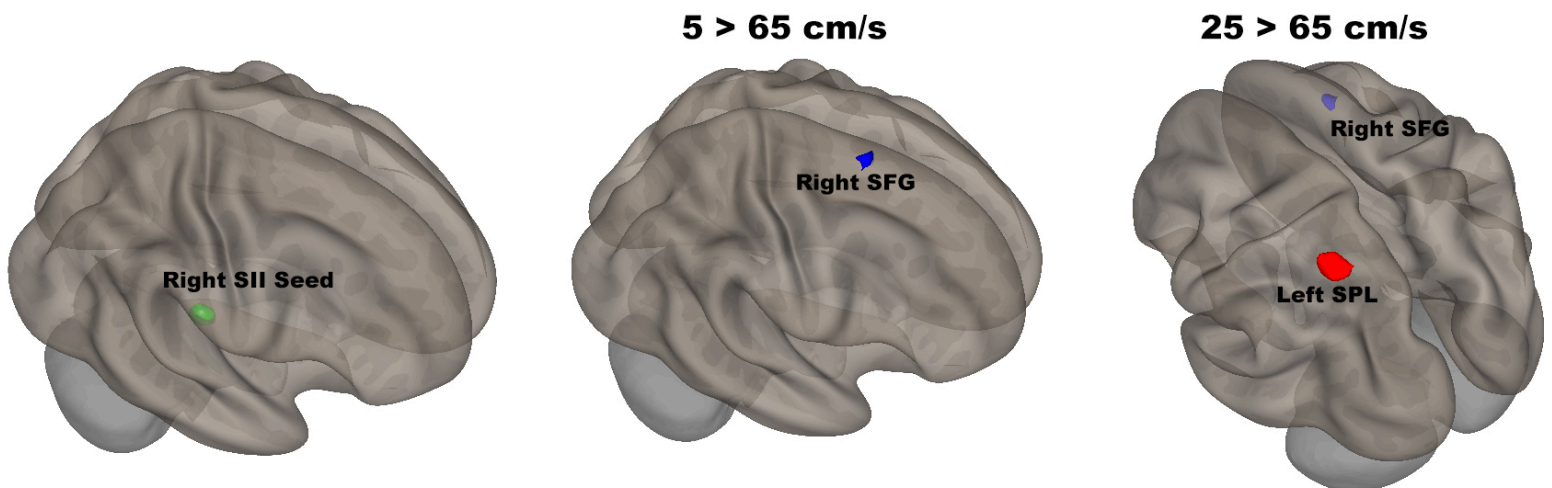

Source: http://biorxiv.org/content/10.1101/843441v1.full.pdf
